# Supplementary material
Source: publisher figshare collection journal article supplement (https://karger.figshare.com/ndownloader/files/13236656)
Supplement: Supplementary file 1 [file 13236656]

**Legend**

Fig S3. *.*Kaplan- Meier analysis of overall survival in the medically vs. surgically treated patients at seven years follow-up. At the end of the follow-up period , 73% patients were alive in the AVR group and 29% in the medically treated patients (p<.0001).

Fig S4 A Kaplan Meier analysis for all-cause mortality according to the AVR status

Fig S4 B Kaplan Meier analysis for cardiovascular mortality according to AVR status

In medically treated patients, nor survival difference was observed between the four hemodynamic subsets.
